# Supplementary material
Source: publisher figshare collection journal article supplement (https://acs.figshare.com/ndownloader/files/7620793)
Supplement: Supplementary file 1 [file 7620793]

# Supporting Information

## Origin of Magnetism in Hydrothermally Aged 2-line Ferrihydrite Suspensions

Liang Cao,<sup>†,‡</sup> Zhao-Xia Jiang,<sup>§</sup> Yong-Hua Du,<sup>||</sup> Xin-Mao Yin,<sup>⊥,#</sup> Shi-Bo Xi,<sup>||</sup> Wen Wen,<sup>†</sup>

Andrew P. Roberts,<sup>∇</sup> Andrew T. S. Wee,<sup>⊥</sup> Yi-Min Xiong,<sup>‡</sup> Qing-Song Liu,<sup>\*,○,♦</sup> Xing-Yu Gao<sup>\*,†</sup>

<sup>†</sup> Shanghai Institute of Applied Physics, Chinese Academy of Sciences, P. O. Box 800–204, Shanghai, 201800, P. R. China

<sup>‡</sup> High Magnetic Field Laboratory, Chinese Academy of Sciences, 350 Shushanhu Road, Hefei, Anhui, 230031, P. R. China

<sup>§</sup> State Key Laboratory of Lithospheric Evolution, Institute of Geology and Geophysics, Chinese Academy of Sciences, 19 Beitucheng Western Road, Beijing, 100029, P. R. China

<sup>||</sup> Institute of Chemical and Engineering Sciences, A\*STAR (Agency for Science, Technology and Research), 1 Pesek Road, Jurong Island, 627833, Singapore

<sup>⊥</sup> Department of Physics, National University of Singapore, 2 Science Drive 3, 117542, Singapore

<sup>#</sup> SZU-NUS Collaborative Innovation Center for Optoelectronic Science & Technology, Key Laboratory of Optoelectronic Devices and Systems of Ministry of Education and Guangdong Province, College of Optoelectronic Engineering, Shenzhen University, Shenzhen, 518060, P. R. China

<sup>∇</sup> Research School of Earth Sciences, The Australian National University, 142 Mills Road, Canberra, ACT 2601, Australia

<sup>○</sup> Department of Marine Science and Engineering, Southern University of Science and Technology of China, Shenzhen, 518055, P. R. China

<sup>♦</sup> Laboratory for Marine Geology, Qingdao National Oceanography Laboratory for Science and Technology, Qingdao, 266071, P. R. China

\* Corresponding Authors:

qslu@sustc.edu.cn. Phone: (86)-10-82998365. (Q.-S. L.);

gaoxingyu@sinap.ac.cn. Phone: (86)-21-3393-3199. (X.-Y. G.).

Number of pages: 11

Number of Figures: 7

Number of Tables: 1

**XMCD spectrum.** An XMCD spectrum for 6-line ferrihydrite was measured at room temperature, which is above the blocking temperature of 6-line ferrihydrite. It is, therefore, expected that the signal will be close to the noise level of the synchrotron detectors.

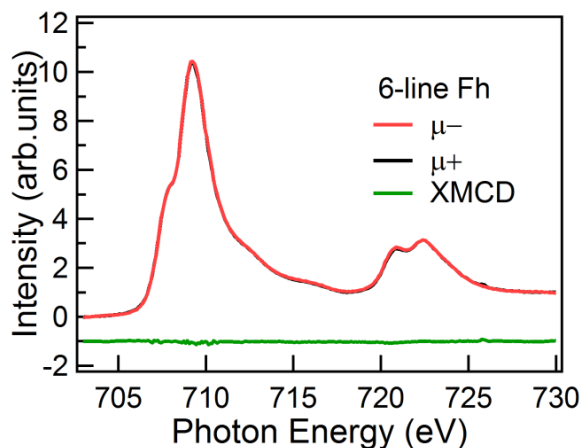

**Figure S1.** XMCD spectrum of 6-line ferrihydrite (Fh) measured at room temperature.

XMCD spectra of hydrothermally aged ferrihydrite are fitted by a linear combination of  $\gamma$ -Fe<sub>2</sub>O<sub>3</sub> and Fe<sub>3</sub>O<sub>4</sub> reference spectra (**Figure S2**). The existence of Fe<sub>3</sub>O<sub>4</sub> during hydrothermal aging can be ruled out because the fitted spectra have a contribution only from the  $\gamma$ -Fe<sub>2</sub>O<sub>3</sub> spectrum with an uncertainty no larger than 3%, which supports the conclusions drawn from Fe *L*-edge XAS and *K*-edge XANES curve-fitting results. The fitting curve for FA10-08 almost perfectly reproduces the experimental data. However, XMCD spectra for 6 h and 10 h aged ferrihydrite have stronger positive tetrahedral Fe<sup>3+</sup> ( $T_d(\text{Fe}^{3+})$ ) than that in the fitted spectra, which suggests that the  $T_d(\text{Fe}^{3+})$  could be stronger in those samples than in  $\gamma$ -Fe<sub>2</sub>O<sub>3</sub> possibly due to a complicated spin arrangement among different sites in the ferrihydrite core and the  $\gamma$ -Fe<sub>2</sub>O<sub>3</sub> shell structures. The XMCD spectra calculated as the intensity difference of XAS spectra naturally have a much larger noise to signal ratio, which inevitably also leads to a larger fitting uncertainty.

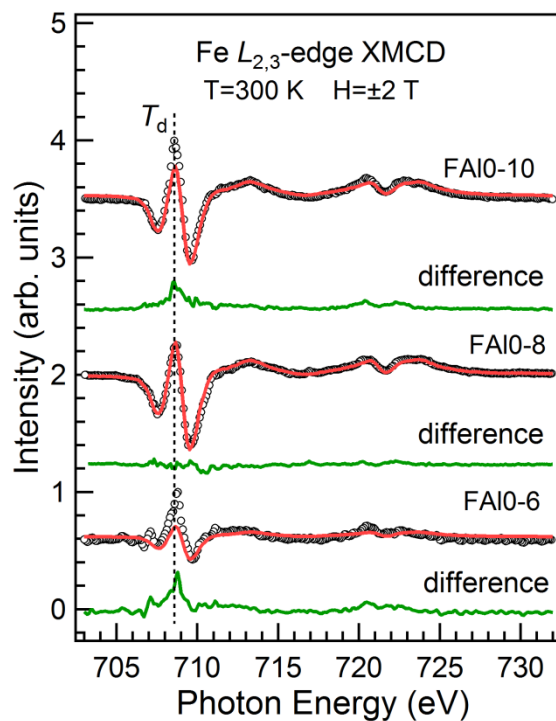

**Figure S2.** Fe  $L_{2,3}$ -edge XMCD spectra for the three studied 2-line ferrihydrite samples with different hydrothermal aging times. The red curves represent best fits by linear combination of  $\gamma$ - $\text{Fe}_2\text{O}_3$  and  $\text{Fe}_3\text{O}_4$  reference spectra. Difference spectra between fitted and experimental data are shown in green.

**Crystal Structure.** Synchrotron-based X-ray diffraction (XRD) measurements were made at the BL14B1 beamline of the Shanghai Synchrotron Radiation Facility (SSRF) with a wavelength of  $0.6887 \text{ \AA}$ .<sup>1</sup> Measurements were made in spinning capillary mode, with samples loaded into a 0.5-mm glass capillary. A Mythen 1 K linear detector, which is mounted on the diffraction arm  $\sim 76 \text{ cm}$  away from the sample, was employed for data acquisition. The typical angular resolution is  $\sim 0.0037^\circ/\text{channel}$  (1280 channels cover a  $2\theta$  range of  $4.8^\circ$ ). Acquisition time for one scan is  $\sim 1$  minute. The data were analyzed using the CMPR program<sup>1</sup> for background subtraction (empty capillary).

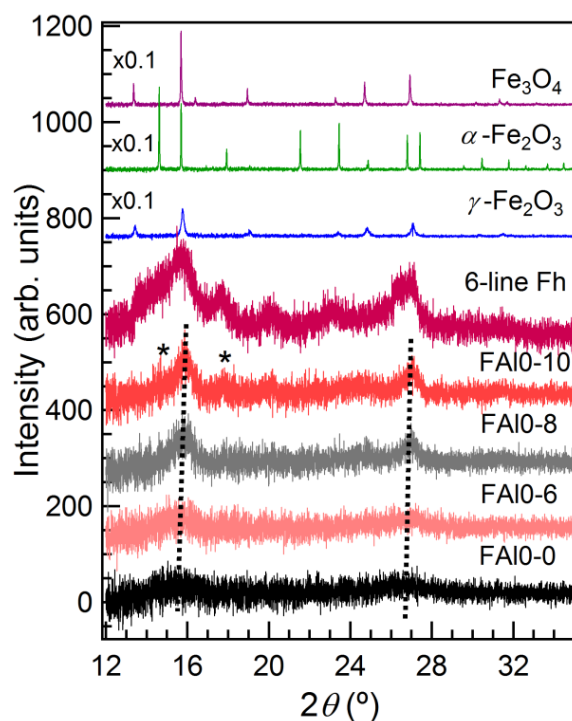

**Figure S3.** X-ray diffraction patterns for the four studied 2-line ferrihydrite samples (wavelength of 0.6887 Å). Standard diffraction patterns for 6-line ferrihydrite,  $\alpha$ -Fe<sub>2</sub>O<sub>3</sub>,  $\gamma$ -Fe<sub>2</sub>O<sub>3</sub> and Fe<sub>3</sub>O<sub>4</sub> are also shown.

The crystal structure of the reference samples and the studied 2-line ferrihydrite samples was further characterized by XRD (**Figure S3**). Two prominent diffraction peaks for samples aged for 10 h are located at  $\sim 15.86^\circ$  and  $\sim 26.95^\circ$ , respectively. The corresponding  $d$  spacings are 2.50 Å and 1.48 Å, respectively. The diffraction intensity increases with hydrothermal aging time, which demonstrates that crystallinity is enhanced during hydrothermal aging. All peaks shift to higher  $2\theta$  angles during hydrothermal aging, which suggests a systematic structural change in the samples. To explain this behavior, the diffraction pattern for the sample after 10 hours of aging at 450 K is compared with diffraction patterns for  $\alpha$ -Fe<sub>2</sub>O<sub>3</sub>,  $\gamma$ -Fe<sub>2</sub>O<sub>3</sub>, Fe<sub>3</sub>O<sub>4</sub> and 6-line ferrihydrite standards. Although all of the standards have diffraction peaks at around  $15.86^\circ$  and  $26.95^\circ$ , the

two peaks for  $\text{Fe}_3\text{O}_4$  occur at slightly smaller angles than for  $\gamma\text{-Fe}_2\text{O}_3$  and for the sample after 10 hours of aging at 450 K. Moreover, based on diffraction peaks at  $\sim 15.86^\circ$  and  $\sim 26.95^\circ$ , the calculated lattice parameter is not consistent with that of a cubic unit cell for  $\text{Fe}_3\text{O}_4$ . For a tetragonal structure, lattice parameters of  $a = b = 8.49 \text{ \AA}$  and  $c = 24.70 \text{ \AA}$  are obtained. Thus,  $\text{Fe}_3\text{O}_4$  should not exist in this sample. Moreover, the weak (asterisked) peaks in **Figure S3** may originate from 6-line ferrihydrite and/or  $\alpha\text{-Fe}_2\text{O}_3$ . The peak at  $\sim 20.09^\circ$  after 10 hours of aging at 450 K is attributed to 6-line ferrihydrite. This sample should, therefore, contain both  $\gamma\text{-Fe}_2\text{O}_3$  and  $\alpha\text{-Fe}_2\text{O}_3$ , but not  $\text{Fe}_3\text{O}_4$ , which supports our XMCD and XAS results.

**Local structure around Fe atoms:** To understand the evolution of the local structure around Fe atoms in ferrihydrite with increasing hydrothermal aging time, *K*-edge extended X-ray absorption fine structure (EXAFS) spectra were measured for standard  $\alpha\text{-Fe}_2\text{O}_3$ ,  $\gamma\text{-Fe}_2\text{O}_3$ ,  $\text{Fe}_3\text{O}_4$ , 6-line ferrihydrite and the four studied 2-line ferrihydrite samples (**Figure S4(a)**). Corresponding phase-shift uncorrected *K*-edge Fourier transform EXAFS spectra are shown in **Figure S4(b)**. The first single coordination peak in the 1~2  $\text{\AA}$  region corresponds to the first Fe-O coordination shells in Fe atoms. The second peak corresponds to the Fe-Fe interatomic distance in second coordination shells. Peaks for  $\alpha\text{-Fe}_2\text{O}_3$ ,  $\gamma\text{-Fe}_2\text{O}_3$  and  $\text{Fe}_3\text{O}_4$  standards are located at  $\sim 2.47 \text{ \AA}$  and  $\sim 2.57 \text{ \AA}$ , respectively.

In general, EXAFS features resemble those of the  $(\alpha\text{-}/\gamma\text{-})\text{Fe}_2\text{O}_3$  standards and are clearly different from those of the  $\text{Fe}_3\text{O}_4$  standard, which indicates that  $\text{Fe}_3\text{O}_4$  does not exist in these samples. The Fe-Fe coordination peak of 2-line ferrihydrite is located at  $\sim 2.57 \text{ \AA}$ , which is comparable with the value for  $\gamma\text{-Fe}_2\text{O}_3$ . Its position decreases gradually to lower values with hydrothermal aging time, and reaches  $\sim 2.50 \text{ \AA}$  after 10 h of aging at 450 K, which suggests a systematic structural change, such as a reduced distortion due to an ordered structure or

dehydration of the mineral surface that resulted from decreased Fe-Fe interatomic distance. It is accepted that spectra for multi-site minerals indicate an intermediate structure. Peak positions for the studied ferrihydrite samples associated with Fe-O coordination (dashed-dot line in **Figure S4(b)**) and Fe-Fe coordination (solid bars in **Figure S4(b)**) all lie between values for  $\alpha$ -Fe<sub>2</sub>O<sub>3</sub> and  $\gamma$ -Fe<sub>2</sub>O<sub>3</sub>, which indicates that the aged samples contain both  $\gamma$ -Fe<sub>2</sub>O<sub>3</sub> and  $\alpha$ -Fe<sub>2</sub>O<sub>3</sub>, but not Fe<sub>3</sub>O<sub>4</sub>, which supports our XMCD and XAS results.

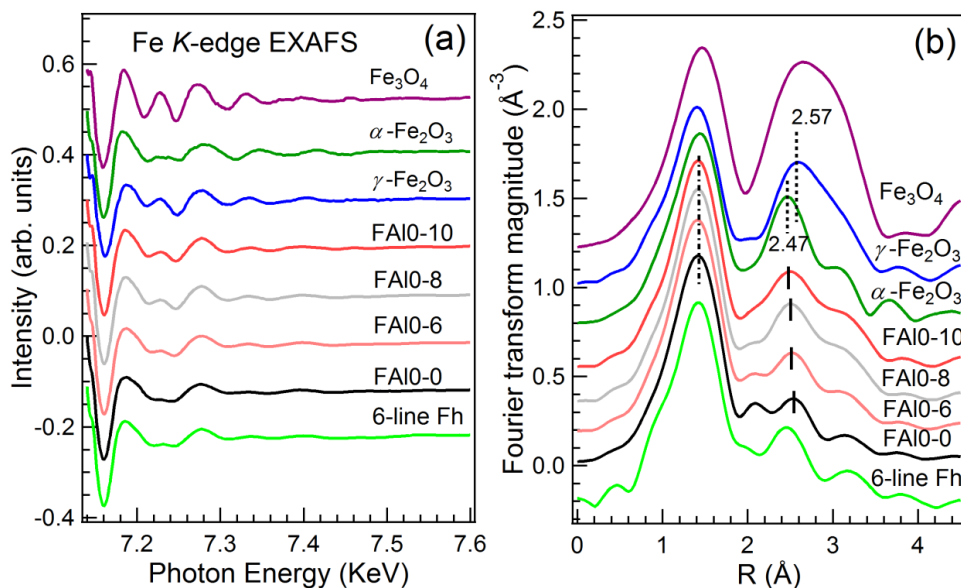

**Figure S4.** (a) K-edge EXAFS spectra for four studied 2-line ferrihydrite samples and standard samples of  $\alpha$ -Fe<sub>2</sub>O<sub>3</sub>,  $\gamma$ -Fe<sub>2</sub>O<sub>3</sub>, Fe<sub>3</sub>O<sub>4</sub> and 6-line ferrihydrite throughout the continuum energy region and (b) corresponding phased-shift uncorrected K-edge Fourier transform EXAFS spectra. Fe-Fe associated coordination peaks at  $\sim 2.47$  Å and  $\sim 2.57$  Å for  $\alpha$ -Fe<sub>2</sub>O<sub>3</sub>,  $\gamma$ -Fe<sub>2</sub>O<sub>3</sub> and Fe<sub>3</sub>O<sub>4</sub> are marked by dashed vertical lines, respectively. Solid lines indicate evolution of Fe-Fe coordination peaks for 2-line ferrihydrite with hydrothermal treatment time. The dash-dot line indicates the position of Fe-O coordination peaks for the studied ferrihydrite samples.

**The influence of longer-range order on spectra.** *L*-edge XAS spectra and *K*-edge XANES spectra for 2-line and 6-line ferrihydrite samples at room temperature are shown in **Figure S5**. XAS spectra at the *L*-edge for two samples were measured using linear polarized soft X-rays. As shown in **Figure S5**, the Fe *L*- and *K*-edge spectra for 2-line ferrihydrite resemble that of 6-line ferrihydrite, although 6-line ferrihydrite has longer-range order than that of 2-line ferrihydrite, which corresponds well with literature reports.<sup>2,3</sup> It is not surprising that structural disorder has little influence on spectral shape in both *L*-edge XAS and *K*-edge XANES spectra because the spectra are dominated by quasi-atomic transitions, with minor modification from the solid state environment for the *L*-edge,<sup>4</sup> whereas for *K*-edge XANES spectra, the influence of structural order can be largely ignored, as the shape and intensity of main edge features are sensitive to short-range order (particularly the first coordination shell) around sites.

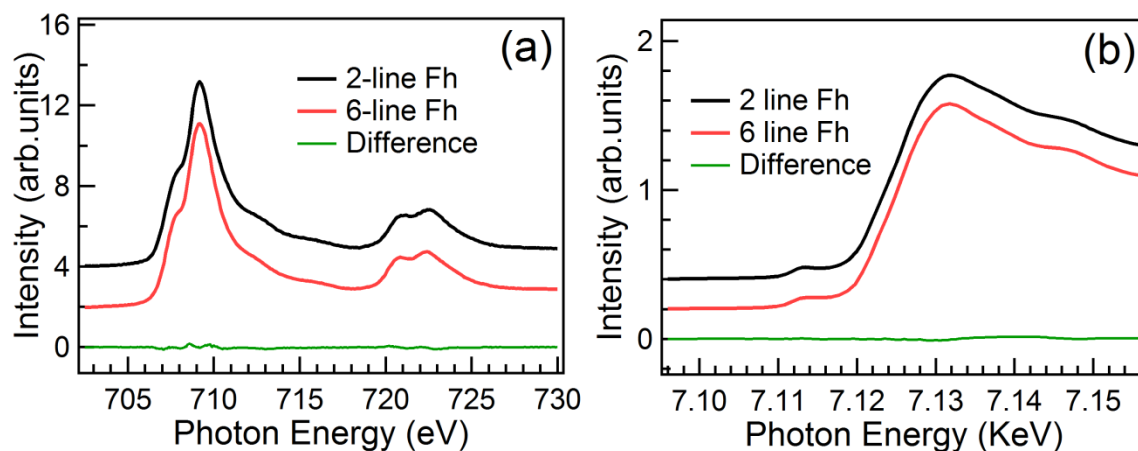

**Figure S5.** (a) *L*-edge XAS and (b) *K*-edge XANES spectra for 2-line and 6-line ferrihydrite. The difference spectrum is shown at the bottom of each panel.

Oxygen *K*-edge spectra for four studied samples and three reference phases of hematite, maghemite and magnetite are shown in **Figure S6**. The higher energy features between 533 eV and 545 eV are generally attributed to the transition from the O 1s to O 2p hybridized with the Fe

4s and 4p states. Pre-edge features in the 528~533 eV region are attributed to the transition from O 1s to O 2p states hybridized with Fe 3d states, which are split into  $t_{2g}$  and  $e_g$  states due to the oxygen octahedral crystal field.<sup>5,6</sup> The pre-edge features of the magnetite reference have higher positions and slightly worse resolution than that of hematite, which is in accordance with findings reported by Wu et al.<sup>7</sup> The formation of goethite is ruled out, otherwise a new feature located at the higher energy side of  $e_g$  resonance should emerge,<sup>8,9</sup> which is in good agreement with results from magnetic measurements.<sup>10</sup> It is worth noting that the measured XAS signal has a contribution from oxygen contamination due to air exposure, so that the accuracy of the intensity of each feature is unknown. However, this does not alter the main conclusion that  $\alpha$ - and  $\gamma$ -Fe<sub>2</sub>O<sub>3</sub> formed and contribute to evolution of the spectral profile at the O K-edge for hydrothermally aged ferrihydrite.

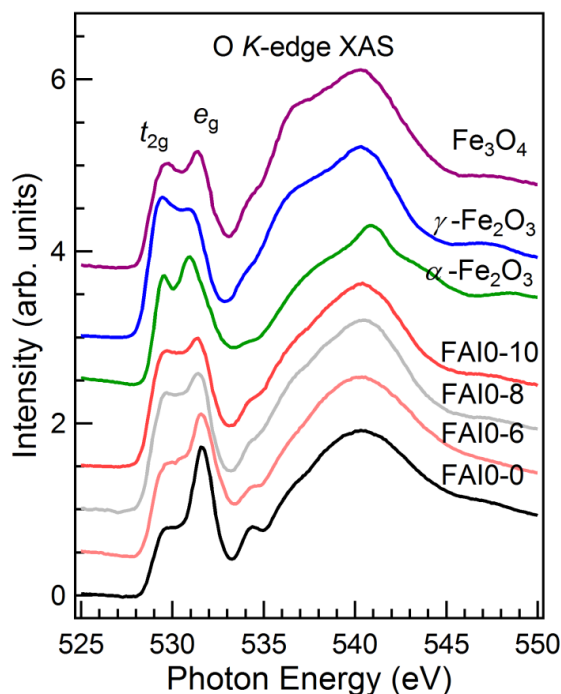

**Figure S6.** Oxygen *K*-edge XAS spectra for the four studied 2-line ferrihydrite samples and for three reference samples.

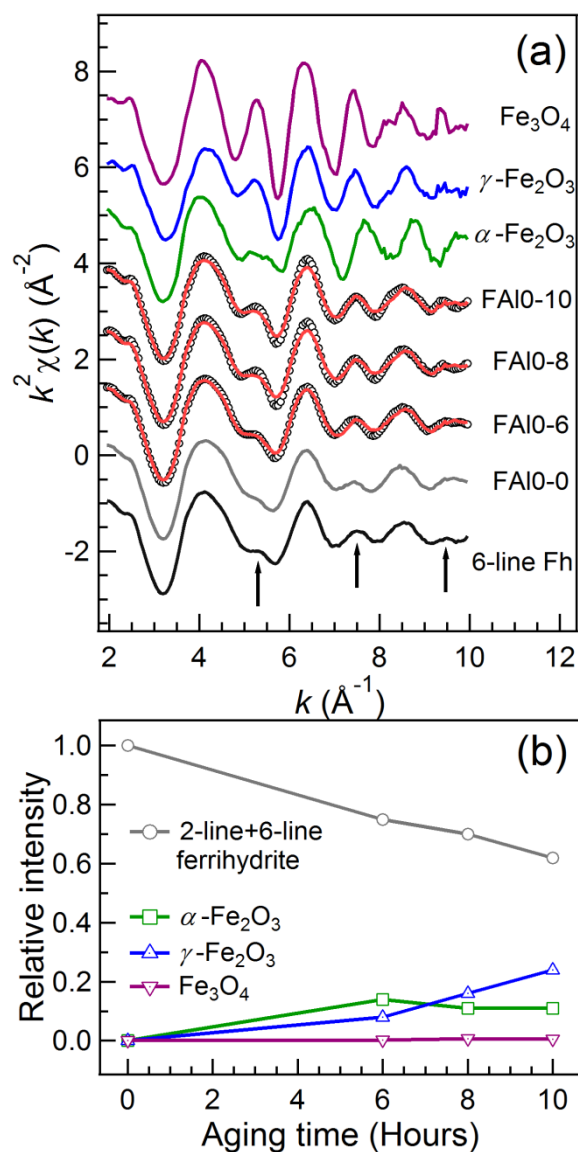

**Figure S7.** (a)  $k^2$ -weighted EXAFS spectra for four studied 2-line ferrihydrite samples, three iron oxide reference samples and a 6-line ferrihydrite reference. Arrows indicate oscillations for ferrihydrite, which are structural order dependent. Red solid lines represent best-fit curves for  $k = 2$ -10 Å<sup>-1</sup>. (b) Concentrations of different Fe oxides as a function of hydrothermal aging time.

In order to validate the linear combination fitting of  $K$ -edge XANES spectra, linear combination fitting of  $k$  spaced EXAFS spectra for studied samples was performed and results are shown as red curves in **Figure S7(a)**. Considering the transformation of 6-line ferrihydrite

revealed by XRD and dependence of EXAFS spectra on structural order (arrows in **Figure S7(a)**), a 6-line ferrihydrite reference was selected. Compositions from the best fits are listed in **Table S1**. Evolution of each component vs hydrothermal aging time (**Figure S7(b)**) is consistent with linear combination fitting of *K*-edge XANES spectra, which confirms their validity.

**Table S1.** Contributions to  $k^2\chi(k)$  EXAFS spectra from chemical species present for different hydrothermal aging times.

| XAS                                        | Sample  | $k^2\chi(k)$ EXAFS spectra contribution (%) |           |                                          |                                          |                                | $\chi^2$ |
|--------------------------------------------|---------|---------------------------------------------|-----------|------------------------------------------|------------------------------------------|--------------------------------|----------|
|                                            |         | FA10-0                                      | 6-line Fh | $\alpha$ -Fe <sub>2</sub> O <sub>3</sub> | $\gamma$ -Fe <sub>2</sub> O <sub>3</sub> | Fe <sub>3</sub> O <sub>4</sub> |          |
| <i>K</i> -edge<br>( $k^2\chi(k)$<br>EXAFS) | FA10-6  | 65                                          | 10        | 14                                       | 8                                        | 3                              | 0.002    |
|                                            | FA10-8  | 39                                          | 31        | 11                                       | 16                                       | 3                              | 0.006    |
|                                            | FA10-10 | 35                                          | 27        | 11                                       | 25                                       | 2                              | 0.005    |

## References

- (1) Yang, T.-Y.; Wen, W.; Yin, G.-Z.; Li, X.-L.; Gao, M.; Gu, Y.-L.; Li, L.; Liu, Y.; Lin, H.; Zhang, X.-M.; Zhao, B.; Liu, T.-K.; Yang, Y.-G.; Li, Z.; Zhou, X.-T.; Gao, X.-Y. Introduction of the X-ray diffraction beamline of SSRF. *Nucl. Sci. Tech.* **2015**, 26 (2), 020101.
- (2) Masina, C. J.; Neethling, J. H.; Olivier, E. J.; Manzini, S.; Lodya, L.; Srot, V.; van Aken, P. A. Structural and magnetic properties of ferrihydrite nanoparticles. *RSC Adv.* **2015**, 5 (50), 39643-39650.
- (3) Carta, D.; Casula, M. F.; Corrias, A.; Falqui, A.; Navarra, G.; Pinna, G. Structural and magnetic characterization of synthetic ferrihydrite nanoparticles. *Mater. Chem. Phys.* **2009**, 113 (1), 349-355.
- (4) van der Laan, G.; Kirkman, I. W. The 2*p* absorption spectra of 3*d* transition metal compounds in tetrahedral and octahedral symmetry. *J. Phys.: Condens. Matter* **1992**, 4 (16), 4189.

- (5) Signorini, L.; Pasquini, L.; Savini, L.; Carboni, R.; Boscherini, F.; Bonetti, E.; Giglia, A.; Pedio, M.; Mahne, N.; Nannarone, S. Size-dependent oxidation in iron/iron oxide core-shell nanoparticles. *Phys. Rev. B* **2003**, *68* (19), 195423.
- (6) Chen, S.-Y.; Gloter, A.; Zobelli, A.; Wang, L.; Chen, C.-H.; Colliex, C. Electron energy loss spectroscopy and *ab initio* investigation of iron oxide nanomaterials grown by a hydrothermal process. *Phys. Rev. B* **2009**, *79* (10), 104103.
- (7) Wu, Z. Y.; Gota, S.; Jollet, F.; Pollak, M.; Gautier-Soyer, M.; Natoli, C. R. Characterization of iron oxides by x-ray absorption at the oxygen K edge using a full multiple-scattering approach. *Phys. Rev. B* **1997**, *55* (4), 2570-2577.
- (8) Gilbert, B.; Erbs, J. J.; Penn, R. L.; Petkov, V.; Spagnoli, D.; Waychunas, G. A. A disordered nanoparticle model for 6-line ferrihydrite. *Am. Mineral.* **2013**, *98* (8-9), 1465-1476.
- (9) Brandt, F.; Schäfer, T.; Claret, F.; Bosbach, D. Heterogeneous formation of ferric oxide nanoparticles on chlorite surfaces studied by x-ray absorption spectromicroscopy (STXM). *Chem. Geol.* **2012**, *329*, 42-52.
- (10) Liu, Q.; Barrón, V.; Torrent, J.; Eeckhout, S. G.; Deng, C. Magnetism of intermediate hydromaghemite in the transformation of 2-line ferrihydrite into hematite and its paleoenvironmental implications. *J. Geophys. Res.* **2008**, *113* (B1), B01103.
